# Supplementary material for: Radiomic analysis in contrast-enhanced CT: predict treatment response to chemoradiotherapy in esophageal carcinoma
Source: PubMed Central journal article supplement (PMC5732818; doi:10.18632/oncotarget.22304), 2017-11-06
Supplement: oncotarget-08-104444-s001.pdf [file oncotarget-08-104444-s001.pdf]

## **Radiomic analysis in contrast-enhanced CT: predict treatment response to chemoradiotherapy in esophageal carcinoma**

### **SUPPLEMENTARY MATERIALS**

**Supplementary Table 1: Texture Type and Associated Features.**

**See Supplementary File 1**
